# Supplementary material for: Intravesical Bacillus Calmette-Guérin versus mitomycin C for Ta and T1 bladder cancer: Abridged summary of the Cochrane Review
Source: PubMed Central journal article supplement — Investig Clin Urol. 2020 Jun 29;61(4):349–54. doi: 10.4111/icu.2020.61.4.349 (PMC7329645; doi:10.4111/icu.2020.61.4.349), 2020-06-29
Supplement: icu-61-349-s001.pdf [file icu-61-349-s001.pdf]

## Supplementary material 1. Search strategies

### CENTRAL search strategy

#1 MeSH descriptor: [Urinary Bladder Neoplasms] explode all trees  
#2 bladder\*.ti,ab,kw near/3 (cancer\* or carcinoma\* or neoplas\* or tumo?r\* or malignan\*)ti,ab,kw  
#3 #1 or #2  
#4 MeSH descriptor: [BCG Vaccine] explode all trees  
#5 (bacillus calmette guerin or BCG or calmette guerin)ti,ab,kw  
#6 calmette\*.ti,ab,kw near/3 vaccine\*.ti,ab,kw  
#7 #4 or #5 or #6  
#8 MeSH descriptor: [Mitomycin] explode all trees  
#9 (mitomycin or mitocinc or mitocin c or ametycine or mutamycin or mitocin-c or nsc26980 or nsc-26980 or nsc 26980 or mitomycin-c or 50SG953SK6)ti,ab,kw  
#10 #8 or #9  
#11 #3 and #7 and #10

### MEDLINE (Ovid) search strategy

1 exp urinary bladder neoplasms/  
2 (bladder\* adj3 (cancer\* or carcinoma\* or neoplas\* or tumo?r\* or malignan\*)).tw.  
3 1 or 2  
4 BCG vaccine/  
5 (bacillus calmette guerin or BCG or calmette guerin).mp.  
6 (calmette\* adj3 vaccine\*).mp.  
7 or/4-6  
8 Mitomycin/  
9 50SG953SK6.rn.  
10 (mitomycin or mitocinc or mitocin c or ametycine or mutamycin or mitocin-c or nsc26980 or nsc-26980 or nsc 26980 or mitomycin-c).mp.  
11 or/8-10  
12 3 and 7 and 11  
13 randomized controlled trial.pt.  
14 controlled clinical trial.pt.  
15 randomizedab.  
16 placeboab.  
17 drug therapy.fs.  
18 randomlyab.  
19 trialab.  
20 groupsab.  
21 or/13-20  
22 exp animals/ not humans.sh.  
23 21 not 22  
24 12 and 23

### Embase (Ovid) search strategy

1 exp bladder tumor/

2 (bladder\* adj3 (cancer\* or carcinoma\* or neoplas\* or tumor\* or malignan\*)).tw.  
 3 1 or 2  
 4 exp BCG vaccine/  
 5 (bacillus calmette guerin or BCG or calmette guerin).mp.  
 6 (calmette\* adj3 vaccine\*).mp.  
 7 or/4-6  
 8 exp mitomycin C/  
 9 mitomycin.rn.  
 10 (mitomycin or mitocinc or mitocin c or ametycine or mutamycin or mitocin-c or nsc26980 or nsc-26980 or nsc 26980 or mitomycin-c or 50SG953SK6).mp.  
 11 or/8-10  
 12 3 and 7 and 11  
 13 Crossover Procedure/  
 14 double-blind procedure/  
 15 randomized controlled trial/  
 16 single-blind procedure/  
 17 (random\$ or factorial\$ or crossover\$ or cross over\$ or placebo\$ or assign\$ or allocat\$ or volunteer\$).mp.  
 18 ((doubl\$ or singl\$) adj blind\$).mp.  
 19 or/13-18  
 20 12 and 19

### Scopus search strategy

((TITLE-ABS-KEY(bladder\* W/3 (cancer\* OR carcinoma\* OR tumor\* OR tumour\* OR neoplas\*))) AND (TITLE-ABS-KEY("bacillus calmette Guerin" OR bcg OR calmette)) AND (TITLE-ABS-KEY(mitomycin OR mitocinc OR mitocin c OR ametycine OR mutamycin OR mitocin-c OR nsc26980 OR nsc-26980 OR nsc 26980 OR mitomycin-c OR 50sg953sk6))) AND (TITLE-ABS-KEY("clinical trial\*" OR "research design" OR "comparative stud\*" OR "evaluation stud\*" OR "controlled trial\*" OR "follow-up stud\*" OR "prospective stud\*" OR random\* OR placebo\* OR "single blind\*" OR "double blind\*"))

### Web of Science search strategy

# 1 TS=(bladder\* NEAR/3 (cancer\* or carcinoma\* or tumor\* or tumour\* or neoplas\*))  
*Indexes=SCI-EXPANDED, CPCI-S Timespan=1900-2015*  
 # 2 TS=(BCG vaccine)  
*Indexes=SCI-EXPANDED, CPCI-S Timespan=1900-2015*  
 # 3 TS=(bacillus calmette guerin or BCG or calmette guerin)  
*Indexes=SCI-EXPANDED, CPCI-S Timespan=1900-2015*  
 # 4 TS=(calmette\* NEAR/3 vaccine\*).  
*Indexes=SCI-EXPANDED, CPCI-S Timespan=1900-2015*  
 # 5 #4 OR #3 OR #2  
*Indexes=SCI-EXPANDED, CPCI-S Timespan=1900-2015*  
 # 6 TS=(mitomycin or mitocinc or mitocin c or ametycine or mutamycin or mitocin-c or nsc26980 or nsc-26980 or nsc 26980 or mitomycin-c or 50SG953SK6)  
*Indexes=SCI-EXPANDED, CPCI-S Timespan=1900-2015*  
 # 7 #6 AND #5 AND #1  
*Indexes=SCI-EXPANDED, CPCI-S Timespan=1900-2015*  
 # 8 TS= clinical trial\* OR TS=research design OR TS=comparative stud\* OR TS=evaluation stud\* OR TS=controlled trial\* OR TS=follow-up stud\* OR TS=prospective stud\* OR TS=random\* OR TS=placebo\* OR TS=(single blind\*) OR TS=(double blind\*)  
*Indexes=SCI-EXPANDED, CPCI-S Timespan=1900-2015*

# 9 #8 AND #7

*Indexes=SCI-EXPANDED, CPCS Timespan=1900-2015*

### **LILACS search strategy**

(bladder\* OR vejiga OR bexiga OR vesical) AND (bcg OR bacillus calmette guerin OR calmette) AND (mitomycin OR mitocinc OR mitocin c OR ametycine OR mutamycin OR mitocin-c ) AND ((PT randomized controlled trial OR PT controlled clinical trial OR PT multicenter study OR MH randomized controlled trials as topic OR MH controlled clinical trials as topic OR MH multicenter study as topic OR MH random allocation OR MH double-blind method OR MH single-blind method) OR ((ensaio\$ OR ensayo\$ OR trial\$) AND (azar OR acaso OR placebo OR control\$ OR aleat\$ OR random\$ OR enmascarado\$ OR simpleciego OR ((simple\$ OR single OR duplo\$ OR doble\$ OR double\$) AND (cego OR ciego OR blind OR mask))) AND clinic\$)) AND NOT (MH animals OR MH rabbits OR MH rats OR MH primates OR MH dogs OR MH cats OR MH swine OR PT in vitro)

### **WHO ICTRP search strategy**

1. Bladder\* AND BCG AND mitomycin
2. Bladder\* AND “Bacillus Calmette Guerin” AND mitomycin

### **ClinicalTrials.gov search strategy**

1. Bladder\* AND BCG AND mitomycin
2. Bladder\* AND “Bacillus Calmette Guerin” AND mitomycin
