# Supplementary material for: Intravesical Bacillus Calmette-Guérin versus mitomycin C for Ta and T1 bladder cancer: Abridged summary of the Cochrane Review
Source: PubMed Central journal article supplement — Investig Clin Urol. 2020 Jun 29;61(4):349–54. doi: 10.4111/icu.2020.61.4.349 (PMC7329645; doi:10.4111/icu.2020.61.4.349), 2020-06-29
Supplement: icu-61-349-s003.pdf [file icu-61-349-s003.pdf]

|                  | Random sequence generation (selection bias) | Allocation concealment (selection bias) | Blinding of participants and personnel (performance bias) | Blinding of outcome assessment (detection bias): overall survival | Blinding of outcome assessment (detection bias): recurrence and progression free survival | Blinding of outcome assessment (detection bias): serious and non-serious adverse effects | Blinding of outcome assessment (detection bias): quality of life | Incomplete outcome data (attrition bias): survival outcomes | Incomplete outcome data (attrition bias): adverse effect outcomes | Incomplete outcome data (attrition bias): quality of life outcomes | Selective reporting (reporting bias) | Other bias |
|------------------|---------------------------------------------|-----------------------------------------|-----------------------------------------------------------|-------------------------------------------------------------------|-------------------------------------------------------------------------------------------|------------------------------------------------------------------------------------------|------------------------------------------------------------------|-------------------------------------------------------------|-------------------------------------------------------------------|--------------------------------------------------------------------|--------------------------------------|------------|
| Di Stasi 2003    | ⊙                                           | ⊙                                       | ⊙                                                         | ⊙                                                                 | ⊙                                                                                         | ⊙                                                                                        | ⊙                                                                | ⊙                                                           | ⊙                                                                 | ⊙                                                                  | ⊙                                    | ⊙          |
| Friedrich 2007   | ⊙                                           | ⊙                                       | ⊙                                                         | ⊙                                                                 | ⊙                                                                                         | ⊙                                                                                        | ⊙                                                                | ⊙                                                           | ⊙                                                                 | ⊙                                                                  | ⊙                                    | ⊙          |
| Krege 1996       | ⊙                                           | ⊙                                       | ⊙                                                         | ⊙                                                                 | ⊙                                                                                         | ⊙                                                                                        | ⊙                                                                | ⊙                                                           | ⊙                                                                 | ⊙                                                                  | ⊙                                    | ⊙          |
| Lamm 1995        | ⊙                                           | ⊙                                       | ⊙                                                         | ⊙                                                                 | ⊙                                                                                         | ⊙                                                                                        | ⊙                                                                | ⊙                                                           | ⊙                                                                 | ⊙                                                                  | ⊙                                    | ⊙          |
| Malmström 1999   | ⊙                                           | ⊙                                       | ⊙                                                         | ⊙                                                                 | ⊙                                                                                         | ⊙                                                                                        | ⊙                                                                | ⊙                                                           | ⊙                                                                 | ⊙                                                                  | ⊙                                    | ⊙          |
| Mangiarotti 2008 | ⊙                                           | ⊙                                       | ⊙                                                         | ⊙                                                                 | ⊙                                                                                         | ⊙                                                                                        | ⊙                                                                | ⊙                                                           | ⊙                                                                 | ⊙                                                                  | ⊙                                    | ⊙          |
| Michielsen 2013  | ⊙                                           | ⊙                                       | ⊙                                                         | ⊙                                                                 | ⊙                                                                                         | ⊙                                                                                        | ⊙                                                                | ⊙                                                           | ⊙                                                                 | ⊙                                                                  | ⊙                                    | ⊙          |
| NCT00974818      | ⊙                                           | ⊙                                       | ⊙                                                         | ⊙                                                                 | ⊙                                                                                         | ⊙                                                                                        | ⊙                                                                | ⊙                                                           | ⊙                                                                 | ⊙                                                                  | ⊙                                    | ⊙          |
| Ojea 2007a       | ⊙                                           | ⊙                                       | ⊙                                                         | ⊙                                                                 | ⊙                                                                                         | ⊙                                                                                        | ⊙                                                                | ⊙                                                           | ⊙                                                                 | ⊙                                                                  | ⊙                                    | ⊙          |
| Ojea 2007b       | ⊙                                           | ⊙                                       | ⊙                                                         | ⊙                                                                 | ⊙                                                                                         | ⊙                                                                                        | ⊙                                                                | ⊙                                                           | ⊙                                                                 | ⊙                                                                  | ⊙                                    | ⊙          |
| Rintala 1991     | ⊙                                           | ⊙                                       | ⊙                                                         | ⊙                                                                 | ⊙                                                                                         | ⊙                                                                                        | ⊙                                                                | ⊙                                                           | ⊙                                                                 | ⊙                                                                  | ⊙                                    | ⊙          |
| Witjes 1996a     | ⊙                                           | ⊙                                       | ⊙                                                         | ⊙                                                                 | ⊙                                                                                         | ⊙                                                                                        | ⊙                                                                | ⊙                                                           | ⊙                                                                 | ⊙                                                                  | ⊙                                    | ⊙          |
| Witjes 1996b     | ⊙                                           | ⊙                                       | ⊙                                                         | ⊙                                                                 | ⊙                                                                                         | ⊙                                                                                        | ⊙                                                                | ⊙                                                           | ⊙                                                                 | ⊙                                                                  | ⊙                                    | ⊙          |
| Witjes 1998a     | ⊙                                           | ⊙                                       | ⊙                                                         | ⊙                                                                 | ⊙                                                                                         | ⊙                                                                                        | ⊙                                                                | ⊙                                                           | ⊙                                                                 | ⊙                                                                  | ⊙                                    | ⊙          |

Supplementary Fig. 1. Risk of bias of the included studies.
